# Supplementary material for: The Mental Health in Austrian Teenagers (MHAT) Study: design, methodology, description of study population
Source: Springer Nature journal article supplement (doi:10.1007/s40211-018-0273-2), 2018-06-15
Supplement: MOESM1 [file 15849210]

## **Online Resource 1**

Supplement to:

**The Mental Health in Austrian Teenagers Study (MHAT): design, methodology, description of study population**

Neuropsychiatrie

Michael Zeiler, Gudrun Wagner, Julia Philipp, Martina Nitsch, Stefanie Truttmann, Wolfgang Dür, Andreas Karwautz, Karin Waldherr

Corresponding author:

Karin Waldherr

Ferdinand Porsche Distance Learning University of Applied Sciences

E-Mail: [karin.waldherr@fernfh.ac.at](mailto:karin.waldherr@fernfh.ac.at).

**Online Resource 1:** Actual number of students participated in the MHAT screening stage per school grade, school type and federal state and proportion (%) of the sample size reached compared to the sampling plan

| School grade                             | School type                              | Austrian federal state |                           |               |               |           |          |        |       |            | Sum                    | Total       | % of sampling plan |
|------------------------------------------|------------------------------------------|------------------------|---------------------------|---------------|---------------|-----------|----------|--------|-------|------------|------------------------|-------------|--------------------|
|                                          |                                          | Vienna                 | Burgenland                | Lower Austria | Upper Austria | Carinthia | Salzburg | Styria | Tyrol | Vorarlberg |                        |             |                    |
| 5 <sup>th</sup>                          | General secondary school                 | 41                     | 30                        | 91            | 70            | 24        | 10       | 82     | 32    | 7          | 387                    | 563 (58%)   | 57,50              |
|                                          | Academic secondary school                | 38                     | 19                        | 44            | 29            | 7         | 0        | 34     | 0     | 5          | 176                    |             | 58,86              |
| 7 <sup>th</sup>                          | General secondary school                 | 48                     | 12                        | 154           | 142           | 24        | 34       | 176    | 39    | 31         | 660                    | 923 (95%)   | 96,92              |
|                                          | Academic secondary school                | 43                     | 0                         | 85            | 33            | 5         | 9        | 56     | 0     | 32         | 263                    |             | 90,38              |
| 9 <sup>th</sup>                          | Academic secondary school                | 21                     | 0                         | 90            | 62            | 16        | 15       | 13     | 0     | 33         | 250                    | 1134 (117%) | 89,93              |
|                                          | Polytechnical school                     | 38                     | 6                         | 88            | 48            | 16        | 17       | 22     | 31    | 20         | 286                    |             | 124,89             |
|                                          | Vocational school                        | 88                     | 2                         | 164           | 115           | 26        | 75       | 61     | 49    | 18         | 598                    |             | 128,60             |
| 11 <sup>th</sup>                         | Academic secondary school                | 33                     | 9                         | 36            | 29            | 12        | 0        | 33     | 16    | 41         | 209                    | 990 (107%)  | 110,00             |
|                                          | Vocational school                        | 70                     | 13                        | 91            | 111           | 9         | 12       | 58     | 33    | 4          | 401                    |             | 117,60             |
|                                          | Part-time vocational school <sup>1</sup> | 78                     | 0                         | 105           | 66            | 12        | 0        | 71     | 9     | 39         | 380                    |             | 95,72              |
| <b>Sum</b>                               |                                          | 498                    | 91                        | 948           | 705           | 151       | 172      | 606    | 209   | 230        | <b>Total: N = 3610</b> |             |                    |
| <b>% of sampling plan</b>                |                                          | 70,04                  | 71,09                     | 133,71        | 101,59        | 58,53     | 61,21    | 113,91 | 61,47 | 120,42     | 93,91                  |             |                    |
| <b>School types</b>                      |                                          | <b>Sum</b>             | <b>% of sampling plan</b> |               |               |           |          |        |       |            |                        |             |                    |
| General secondary school                 |                                          | 1047                   | 77,33                     |               |               |           |          |        |       |            |                        |             |                    |
| Academic secondary school                |                                          | 898                    | 84,88                     |               |               |           |          |        |       |            |                        |             |                    |
| Polytechnical school                     |                                          | 286                    | 124,89                    |               |               |           |          |        |       |            |                        |             |                    |
| Vocational school                        |                                          | 999                    | 123,95                    |               |               |           |          |        |       |            |                        |             |                    |
| Part-time vocational school <sup>1</sup> |                                          | 380                    | 95,72                     |               |               |           |          |        |       |            |                        |             |                    |
| <b>Total</b>                             |                                          | <b>3610</b>            |                           |               |               |           |          |        |       |            |                        |             |                    |

<sup>1</sup> with apprenticeship training

Note: As for 5 participants data on school grade and/or school type and/or federal state was missing, the total sample size is reduced from 3615 to 3610 in this table.
